# Supplementary material for: Assessing the Gene Content of the Megagenome: Sugar Pine (Pinus lambertiana)
Source: PubMed Central journal article supplement (PMC5144951; doi:10.1534/g3.116.032805), 2016-10-31
Supplement: supp_g3.116.032805_FigureS2.pdf [file supp_g3.116.032805_FigureS2.pdf]

88  
90  
92  
94  
96  
98  
100  
102  
104  
106  
108  
110  
112  
114  
116  
118  
120  
122  
124  
126  
128  
130

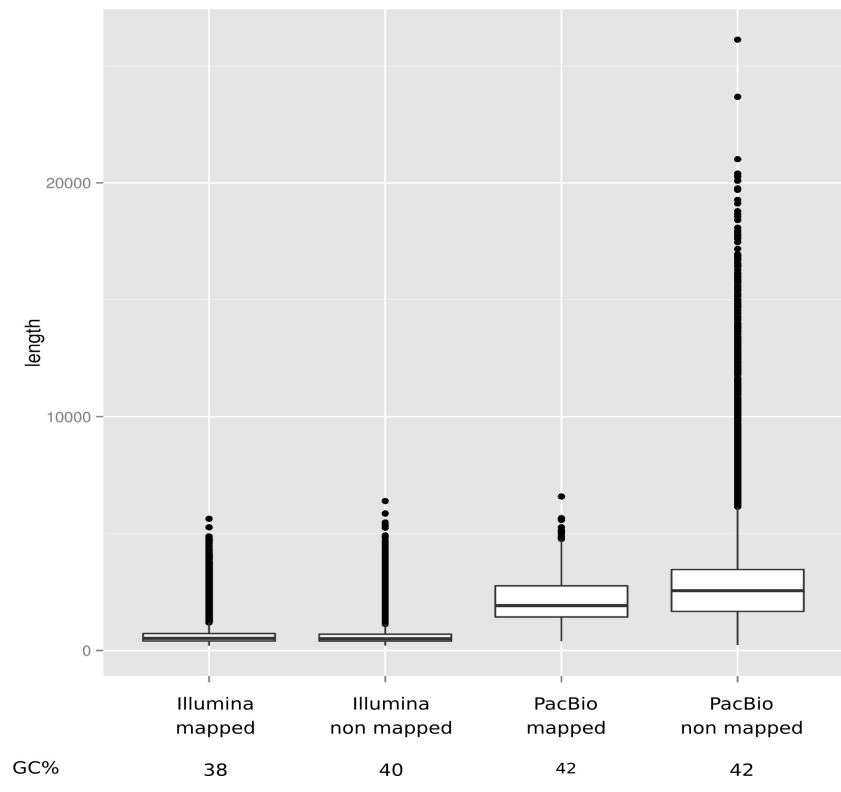

**Figure S2.** Transcript length distribution of assembled transcripts where no CDS was identified. Data are shown for Illumina or PacBio libraries, and for transcripts that could be aligned (or not aligned) on the *P. lambertiana* genome. Average GC content of transcripts is shown in the bottom of the figure.
