# Supplementary material for: Assessing the Gene Content of the Megagenome: Sugar Pine (Pinus lambertiana)
Source: PubMed Central journal article supplement (PMC5144951; doi:10.1534/g3.116.032805), 2016-10-31
Supplement: supp_g3.116.032805_FigureS5.pdf [file supp_g3.116.032805_FigureS5.pdf]

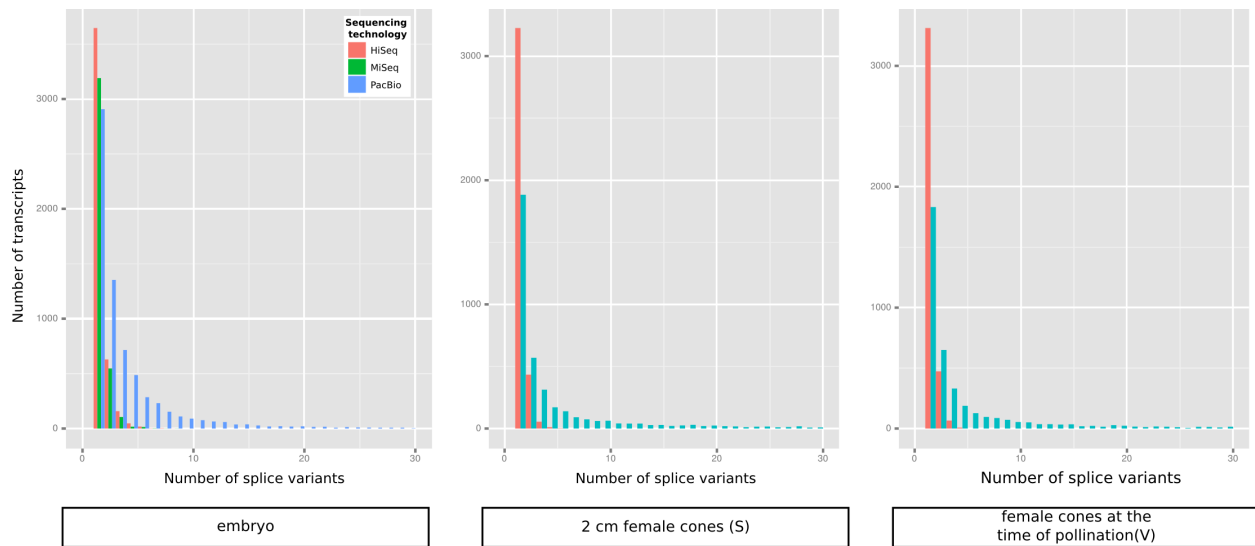

156

**Figure S5.**

158 Number of splice variants provided by each technology in “embryo”, “2 cm female cones” and “female  
 160 cones at the time of pollination” samples.

162

164

166

168

170

172

174

176

178

180

182

184

186
