# Supplementary material for: Assessing the Gene Content of the Megagenome: Sugar Pine (Pinus lambertiana)
Source: PubMed Central journal article supplement (PMC5144951; doi:10.1534/g3.116.032805), 2016-10-31
Supplement: supp_g3.116.032805_FigureS6.pdf [file supp_g3.116.032805_FigureS6.pdf]

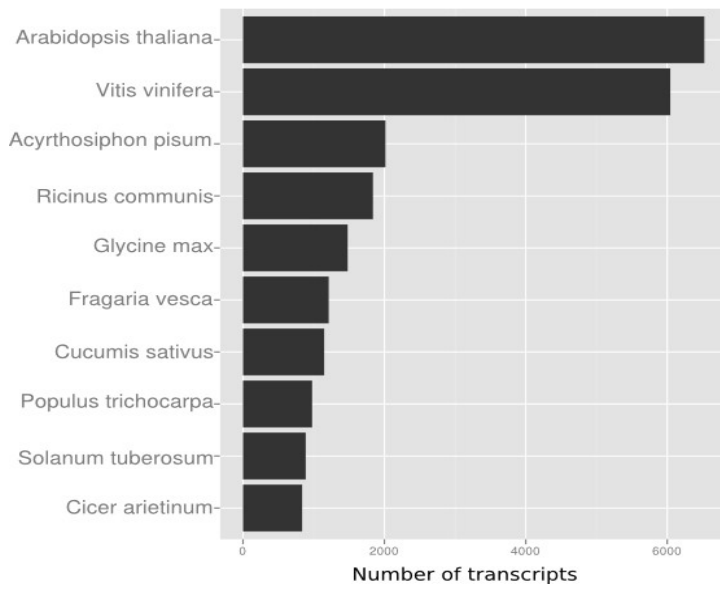

**Figure S6.** Plant species with the most protein sequence similarity to *P. lambertiana* transcripts

156

158

160

162

164

166

168

170

172

174

176

178

180

182

184

186
