# Supplementary material for: Assessing the Gene Content of the Megagenome: Sugar Pine (Pinus lambertiana)
Source: PubMed Central journal article supplement (PMC5144951; doi:10.1534/g3.116.032805), 2016-10-31
Supplement: supp_g3.116.032805_FigureS7.pdf [file supp_g3.116.032805_FigureS7.pdf]

188

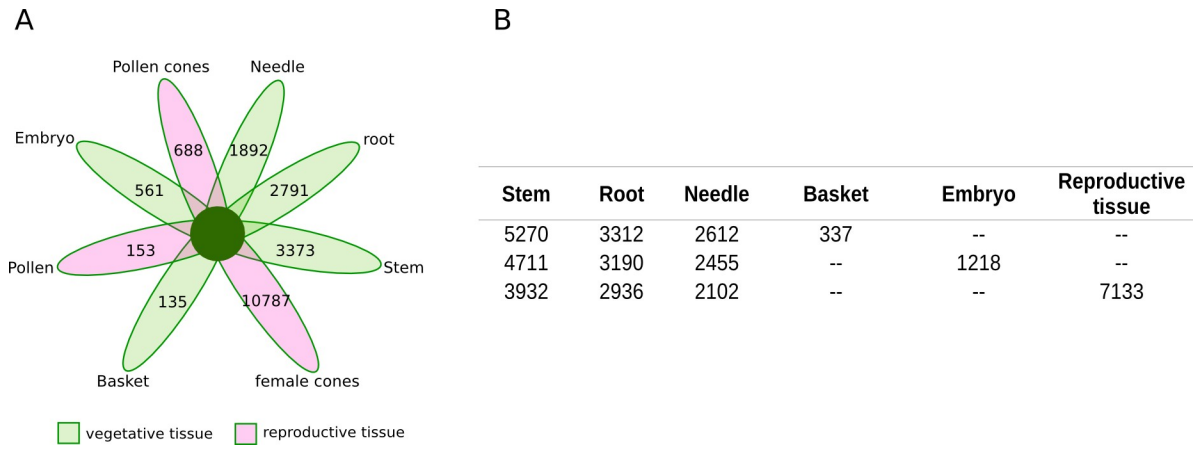

192

194

196

**Figure S7.** Transcriptome characterization by tissue samples. (A) number of identified tissue-specific transcripts. (B) Number of unique transcripts when comparing the three vegetative tissues (stem, root and needle) with basket, embryo and pooled reproductive tissues (cones and pollen).

200

202

204

206
