# Supplementary material for: Assessing the Gene Content of the Megagenome: Sugar Pine (Pinus lambertiana)
Source: PubMed Central journal article supplement (PMC5144951; doi:10.1534/g3.116.032805), 2016-10-31
Supplement: supp_g3.116.032805_FigureS8.pdf [file supp_g3.116.032805_FigureS8.pdf]

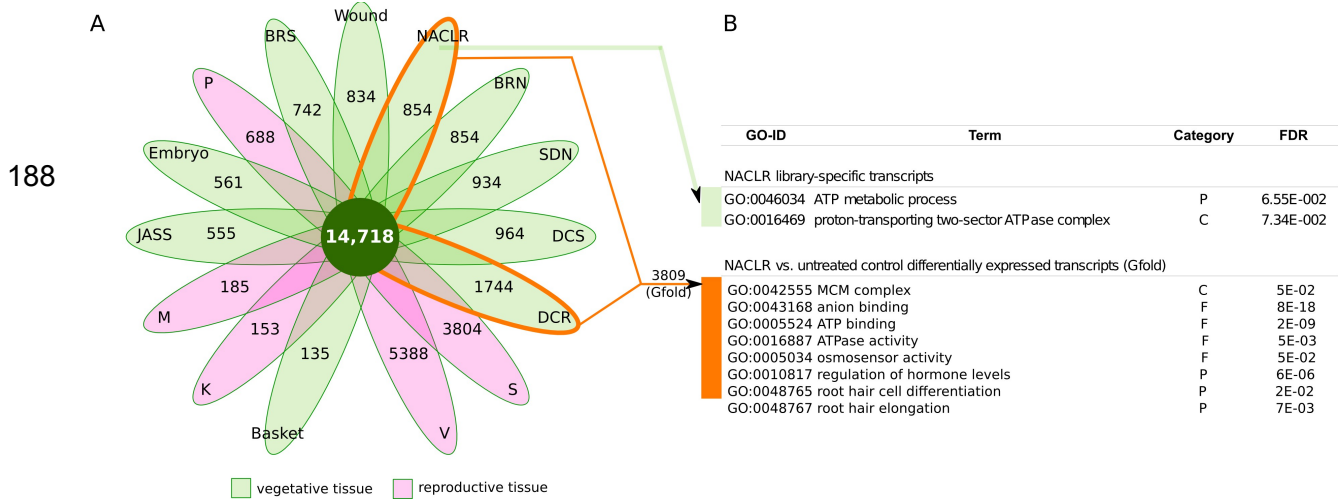

**Figure S8.** Treatment-specific *P. lambertiana* transcripts analysis. (A) Number of treatment-specific transcripts for each analyzed tissue (green background): K (pollen), M (early female cones (2 weeks) before pollination), P (pollen cones), E1 (seed), Basket (root), stem and needles), SDN (needle), BRS (stem), WS (stem), NACLR (root), JAS (stem), S (2 cm female cones), V (female cones at time of pollination), DCR (root), DCS (stem), BRN (needle). (B) Gene Ontology (GO) terms overrepresented in the library-specific NACLR transcripts (green), and differentially expressed transcripts in NaCl treated samples (NACLR) compared to the root healthy control (DCR) (orange), identified with Gfold.

192

194

196

200

202

204

206
