# Supplementary material for: Assessing the Gene Content of the Megagenome: Sugar Pine (Pinus lambertiana)
Source: PubMed Central journal article supplement (PMC5144951; doi:10.1534/g3.116.032805), 2016-10-31
Supplement: supp_g3.116.032805_FigureS9.pdf [file supp_g3.116.032805_FigureS9.pdf]

208  
210  
212  
214  
216  
218  
220  
222  
224  
226  
228  
230  
232  
234  
236  
238  
240  
242  
244  
246  
248  
250  
252  
254  
256  
258

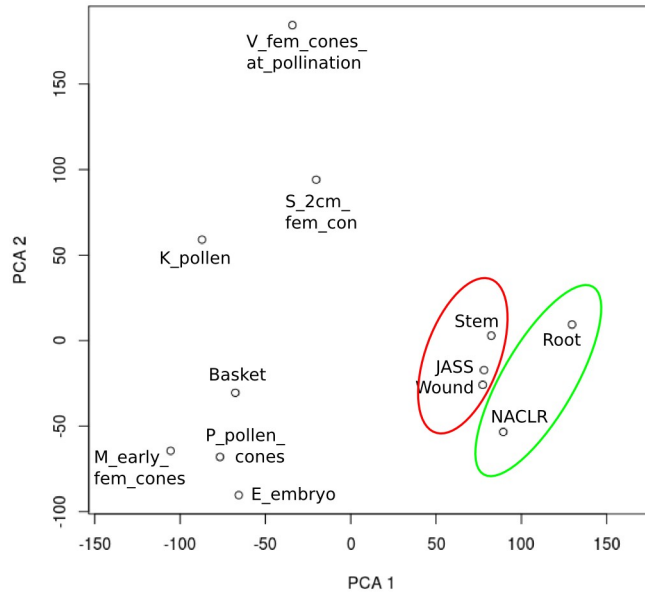

**Figure S9.** Principal component analysis (PCA) of sugar pine samples used for gene expression estimation. Red circle groups stem samples and green circle root samples. Reproductive and vegetative tissue samples grouped in opposite sides of the plot, except for Basket samples, we assumed due to be a mix of plant tissues. Transcriptomic changes were of higher magnitude for different developmental stages than for vegetative tissue after treatments (jasmonate, wounding or NaCl). It is also worth noting the roughly parallel direction of both components describing stem and root treatments.
