# Supplementary material for: Assessing the Gene Content of the Megagenome: Sugar Pine (Pinus lambertiana)
Source: PubMed Central journal article supplement (PMC5144951; doi:10.1534/g3.116.032805), 2016-10-31
Supplement: supp_g3.116.032805_FigureS10.pdf [file supp_g3.116.032805_FigureS10.pdf]

208  
 210  
 212  
 214  
 216  
 218  
 220  
 222  
 224  
 226  
 228  
 230  
 232  
 234  
 236  
 238  
 240  
 242  
 244  
 246  
 248  
 250  
 252  
 254  
 256  
 258

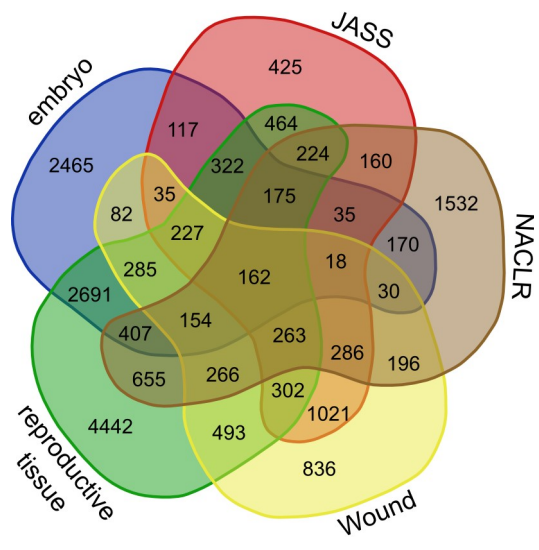

**Figure S10.** Number of unique and shared differentially expressed transcripts for stressed tissues, embryo samples and pooled reproductive tissues (cones and pollen).
