# Supplementary material for: Assessing the Gene Content of the Megagenome: Sugar Pine (Pinus lambertiana)
Source: PubMed Central journal article supplement (PMC5144951; doi:10.1534/g3.116.032805), 2016-10-31
Supplement: supp_g3.116.032805_FigureS12.pdf [file supp_g3.116.032805_FigureS12.pdf]

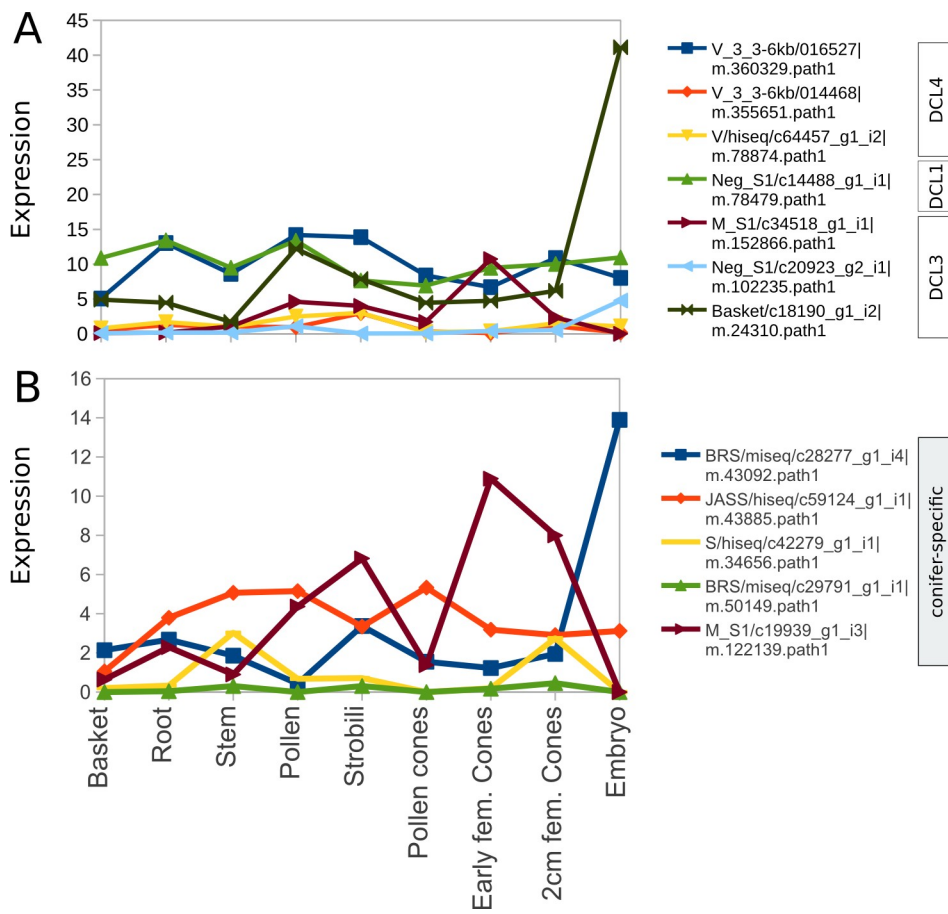

**Figure S12.** Gene expression analysis inferred from sequencing data of *P. lambertiana* transcripts codifying for DCL proteins. (A) Conventional DCL sequences with sequence similarity to other plant species. (B) Potential conifer-specific DCL1 proteins deduced from phylogenetic analysis (Figure S11-SN6).
