# Supplementary material for: Assessing the Gene Content of the Megagenome: Sugar Pine (Pinus lambertiana)
Source: PubMed Central journal article supplement (PMC5144951; doi:10.1534/g3.116.032805), 2016-10-31
Supplement: supp_g3.116.032805_FigureS13.pdf [file supp_g3.116.032805_FigureS13.pdf]

318  
320  
322  
324  
326  
328  
330  
332  
334  
336  
338  
340  
342  
344  
346

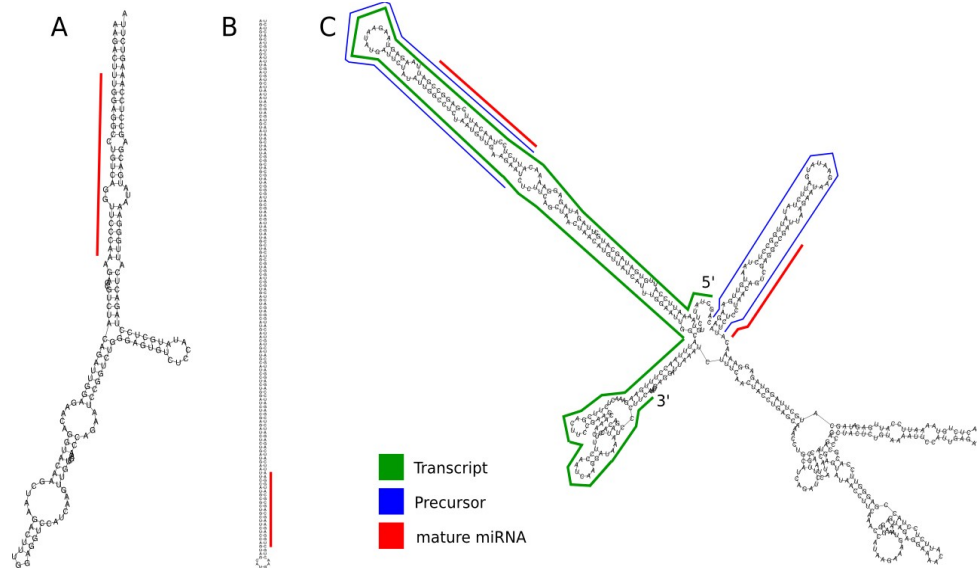

**Figure S13.** Secondary structure from three *P. lambertiana* miRNA precursors. (A) Precursor that meets canonical miRNA requirements. (B) Long precursor with low MFEI index resembling a fold-back transposon. (C) Secondary structure of genomic region potentially coding for two clustered miRNAs.
