# Supplementary material for: Assessing the Gene Content of the Megagenome: Sugar Pine (Pinus lambertiana)
Source: PubMed Central journal article supplement (PMC5144951; doi:10.1534/g3.116.032805), 2016-10-31
Supplement: supp_g3.116.032805_FileS2.pdf [file supp_g3.116.032805_FileS2.pdf]

## Assessing the gene content of the megagenome : sugar pine (*Pinus lambertiana*)

Daniel Gonzalez-Ibeas<sup>\*1</sup>, Pedro J. Martínez-García<sup>†1</sup>, Randi A. Famula<sup>†</sup>, Annette Delfino-Mix<sup>‡</sup>, Kristian A. Stevens<sup>§</sup>, Carol A. Loopstra<sup>\*\*</sup>, Charles H. Langley<sup>§</sup>, David B. Neale<sup>†2</sup>, Jill L. Wegrzyn<sup>\*2</sup>

<sup>\*</sup>Department of Ecology and Evolutionary Biology, University of Connecticut, Storrs, CT USA

<sup>†</sup>Department of Plant Sciences, University of California, Davis, CA USA

<sup>‡</sup>USDA Forest Service, Institute of Forest Genetics, Placerville, CA, USA

<sup>§</sup>Department of Evolution and Ecology, University of California, Davis, CA USA

<sup>\*\*</sup>Department of Ecosystem Science and Management, Texas A&M University, College Station, TX USA

<sup>1</sup>Equal contribution

<sup>2</sup>Corresponding authors

### SUPPLEMENTAL TEXT

#### File S2

**Tissue and Library Characterization:** NACLR sample (root after NaCl treatment) was used as a case study to compare library-specific (854) and differentially expressed (3,809) transcripts after treatment. A total of 854 transcripts were identified as library-specific. Gene Ontology (GO) term analysis of the library-specific set shows enrichment of categories potentially related to the Na<sup>+</sup>/H<sup>+</sup> exchange by means of ATP hydrolysis for Na<sup>+</sup> exclusion and/or vacuolar accumulation during the salt stress response (Figure S8). This is likely due to the presence of 11 transcripts annotated as ATPases, including three P-type ATPases (IPR008250, IPR006068, IPR004014) and two V-type ATPases (IPR002379). GO term analysis of the differentially expressed transcripts in treated samples relative to untreated control showed also categories related to ATPase and osmosensor activity, ion binding and root hair elongation. Among the NACLR-specific transcripts, only 233 were differentially expressed after treatment, including two of the P-type ATPases.

**Transcript Abundance Estimation:** Treated samples have been compared to their respective untreated control (see methods), and reproductive tissue has been compared to the basket stage seedling sample, as a mix of vegetative (needle, root and stem) tissue. On average, 5,958 transcripts were identified as differentially expressed in each sample with a fold change > 2.0. Gene Ontology terms overrepresented in differentially expressed genes were also assessed (Table S4, Table 3). A total of 3,809 differentially expressed transcripts were identified in NaCl treated

42 roots, with GO terms associated with genes involved in stress response, including DnaJ-like  
44 chaperone proteins, transcripts related to the glutathione and ubiquitin pathways, calcium-  
46 transporting ATPases, and ethylene-responsive transcription factors. Abiotic stresses, such as  
48 drought, salt and freezing, lead to the disruption of the plant water status that, in turn, provokes  
50 similar physiological consequences. We identified as differentially expressed several “early  
52 responsive to dehydration” transcripts. In *Arabidopsis*, these genes are rapidly induced by  
54 dehydration and encompass varied functions and localizations (Alves et al, 2011). For example,  
differentially expressed *P. lambertiana* transcripts in treated samples had sequence similarity to  
ERD1, ERD2 and ERD4 (a chloroplast ATP-dependent protease, a cytosolic HSP70 and a  
membrane protein). Genes related to the MCM complex were also differentially expressed.  
These were primarily helicases which are often up-regulated in response to salt stress in plants  
(Dang *et al.* 2011a, Dang *et al.* 2011b). These findings support studies that DNA replication  
machinery can be exploited for promoting stress tolerance in crops (Tuteja *et al.* 2012).

56 Genes related to osmosensor activity were uniquely over-represented in NaCl-treated samples,  
including three different histidine kinases, one similar to a two component release system.  
58 Several sensory histidine kinases have been reported to have a role as osmosensors in plants,  
indicating a possible cross-talk between hormone and stress responsive cascades (Nongpiur *et al.*  
60 2012). Interestingly, this *P. lambertiana* transcript was down-regulated, in agreement with the  
role of some histidine kinases as negative regulators (Nongpiur *et al.* 2012; Tran *et al.* 2007).  
62 Other categories found in the NaCl treated samples were hormone signaling, including auxin and  
gibberellin which are expected reactions under salinity stress (Nongpiur *et al.* 2012; Singh,  
64 Singla-Pareek, and Pareek 2011). In addition, several genes related to root morphogenesis and  
root hair elongation, primarily cellulose synthase proteins, likely due to known modifications in  
66 cell wall structure, were enriched (Le Gall *et al.* 2015). Analysis of the library-specific  
(down/up)-regulated transcripts found a number of differentially expressed pentatricopeptide  
68 repeat proteins (PPR), which have been associated with abiotic stress responses for both  
organelle- and non-organelle-localized types. Overexpression of PPR proteins have been  
70 reported to increase salt tolerance in *Arabidopsis* (Barkan and Small 2014; Zsigmond *et al.* 2012;  
Jiang *et al.* 2015; Yuan and Liu 2012).

72  
Jasmonic acid, a fatty-acid-derived signaling molecule, is involved in several aspects of plant  
74 biology including pollen and seed development, and defense against wounding, ozone, insect  
pests and microbial pathogens (Kunkel and Brooks 2002). In particular, methyl jasmonate is  
76 associated with increased resistance to fungal infection in Norway spruce (Krokene, Nagy, and  
Solheim 2008). Several differentially expressed genes flagged with the GO term “defense  
78 response” were identified in methyl-jasmonate-treated samples. These included 16 transcripts  
annotated as TIR-NBS-LRR class disease resistance proteins, a subfamily of NBS-LRR proteins  
80 involved in the detection of diverse pathogens, including bacteria, viruses, fungi, nematodes,  
insects and oomycetes (McHale *et al.* 2006). Additional genes included defensin-like, ethylene-  
82 responsive, heat shock proteins, WRKY transcription factors, and MYB transcription factors.

84 However, even though research on fatty acid-based signaling systems in plants has focused  
85 mainly on jasmonic acid, growing evidence suggests that compounds of the same or related  
86 biochemical pathways may have a role in signaling of pathogen defense, for example  
87 Cyclopentenones (Howe *et al* 2001). These compounds are oxylipids derived from  
88 polyunsaturated fatty acids and structurally similar to jasmonic acid. A few of these, such as 12-  
89 oxo-phytodienoic acid, are known to be a physiological signal for defense (Howe 2001). Fifteen  
90 genes were associated with “response to cyclopentenone” in methyl-jasmonate-treated samples.  
91 The majority of these were topoisomerases, likely participating in DNA re-modeling for  
92 transcription, but were surprisingly down-regulated. Several genes related to the gibberellin  
93 pathway were also differentially expressed. It has been described that plants promote defense  
94 over growth under pathogen signaling by interfering with gibberellin signaling cascade by means  
95 of jasmonate (Yang *et al.* 2012). The identification of these genes in treated samples may be  
96 reflecting this pathway cross-talk.

97 The comparison of reproductive tissues with vegetative revealed overwhelming  
98 overrepresentation of GO terms related to chloroplast localization, photosynthesis and thylakoid  
99 membrane. As expected, this was observed in all cone samples (male or female) and pollen.  
100 Other distinguishing features of reproductive tissue included a large number of differentially  
101 expressed MADS-box-like transcripts and squamosa-like transcription factors, known to  
102 participate in developmental processes in plants, including conifers (Gramzow and Theissen  
103 2010; Mouradov *et al.* 1998). In the case of pollen samples, they were represented in categories  
104 such as “meristematic phase transition” or “pattern specification process”. Gibberellic acid, a  
105 well-known plant hormone stimulating plant growth and development, is a tetracyclic di-  
106 terpenoid compound synthesized via the terpenoid pathway, and requires several types of  
107 enzymes, including terpene synthases (Gupta and Chakrabarty 2013). Down-regulation of  
108 several terpene synthases were responsible for the term “terpene synthase activity” in pollen  
109 samples. The most abundant protein domains identified in cone and pollen differentially  
110 expressed transcripts was “2OG-FeII\_Oxy” (IPR005123), corresponding to 2-oxoglutarate-  
111 dependent dioxygenases (2OGDs), which are involved in a wide range of biological processes,  
112 including DNA demethylation, proline hydroxylation, plant hormone biosynthesis, and  
113 biosynthesis of gibberellins and flavonoids (Kawai, Ono, and Mizutani 2014).

114 Among the enriched processes in female cones, signal transduction (kinases and transmembrane  
115 proteins), transcripts related to the gibberellin pathway and several terms related to  
116 developmental processes, primarily squamosa and MADS-box-like transcripts, were identified.  
117 One transcript annotated with the protein domain Floricaula/leafy, was present in various plant  
118 development proteins that are homologous to Floricaula (FLO) and leafy (LFY) proteins (floral  
119 meristem identity proteins). Specific isoforms are known to be differentially expressed among  
120 male and female cones in *Pinus caribaea* (Dornelas and Rodriguez 2005). The same transcript in  
121 *P. lambertiana* was not differentially expressed in male cones, down-regulated in early female  
122

cones, and over-expressed in 2 cm female cone samples, suggesting potential functional  
124 similarities. Several GO terms related to salicylic acid biosynthesis and metabolism were  
associated with differentially expressed genes. For example, this is seen in down-regulated  
126 genes of early female cone samples and up- and down-regulated genes in embryo samples.  
Generally studied because of its role in plant defense, it is worth noting that salicylic acid also  
128 has roles in plant development and seed germination (Vicente and Plasencia 2011).

### 130 **REFERENCES (only supplemental text)**

Alves, M. S., P. B. Reis, S.P. Dadalto, J. A. Q. A. Faria, E. P. B. Fontes *et al.*, 2011 A novel  
132 transcription factor, ERD15 (Early Responsive to Dehydration 15), connects endoplasmic  
reticulum stress with an osmotic stress-induced cell death signal. *J. Biol. Chem.* 286:  
134 20020-20030.

Dang, H. Q., N. Q. Tran, R. Tuteja, and N. Tuteja, 2011a Promoter of a salinity and cold stress-  
136 Induced MCM6 DNA helicase from pea. *Plant Signal. Behav.* 6(7): 1006-8.

Dang, H. Q., N. Q. Tran, S. S. Gill, R. Tuteja, and N. Tuteja, 2011b A single subunit MCM6 from  
138 pea promotes salinity stress tolerance without affecting yield. *Plant Mol. Biol.* 76: 19-34.

Tuteja, N., S. S. Gill, A. F. Tiburcio, and R. Tuteja, 2012 *Improving crop resistance to abiotic*  
140 *stress*. Wiley-VCH Verlag GmbH & Co. KGaA, Weinheim, Germany.

Nongpiur, R., P. Soni, R. Karan, S. L. Singla-Pareek, and A. Pareek, 2012 Histidine kinases in  
142 plants. *Plant Signal Behav.* 7: 1230-37.

Tran, L. S. P., T. Urao, F. Qin, K. Maruyama, T. Kakimoto *et al.*, 2007 Functional analysis of  
144 AHK1/ATHK1 and cytokinin receptor histidine kinases in response to abscisic acid,  
drought, and salt stress in *Arabidopsis*. *Proc. Natl. Acad. Sci. U. S. A.* 104: 20623-20628.

146 Singh, K., S. L. Singla-Pareek, and A. Pareek, 2011 Dissecting out the crosstalk between salinity  
and hormones in roots of *Arabidopsis*. *OMICS* 15: 913-924.

- 148 Le Gall, H., F. Philippe, J. M. Domon, F. Gillet, J. Pelloux *et al.*, 2015 Cell wall metabolism in  
response to abiotic stress. *Plants* 4(1): 112-66.
- 150 Barkan, A., and I. Small, 2014 Pentatricopeptide repeat proteins in plants. *Annu. Rev. Plant Biol.*  
65: 415-42.
- 152 Zsigmond, L., A. Szepesi, I. Tari, G. Rigo, A. Kiraly *et al.*, 2012 Overexpression of the  
mitochondrial PPR40 gene improves salt tolerance in *Arabidopsis*. *Plant Sci.* 182: 87-93.
- 154 Jiang, S. C., C. Mei, S. Liang, Y. T. Yu, K. Lu *et al.*, 2015 Crucial roles of the pentatricopeptide  
repeat protein SOAR1 in *Arabidopsis* response to drought, salt and cold stresses. *Plant*  
156 *Mol. Biol.* 88: 369-85.
- Yuan, H., and D. Liu, 2012 Functional disruption of the pentatricopeptide protein SLG1 affects  
158 mitochondrial RNA editing, plant development, and responses to abiotic stresses in  
*Arabidopsis*. *Plant J.* 70: 432-444.
- 160 Kunkel, B. N., and D. M. Brooks, 2002 Cross talk between signaling pathways in pathogen  
defense. *Curr. Opin. Plant Biol.* 5: 325-331.
- 162 Krokene, P., N. E. Nagy, and H. Solheim, 2008 Methyl jasmonate and oxalic acid treatment of  
Norway spruce: anatomically based defense responses and increased resistance against  
164 fungal infection. *Tree Physiol.* 28: 29-35.
- McHale, L., X. Tan, P. Koehl, and R. W. Michelmore, 2006 Plant NBS-LRR proteins: adaptable  
166 guards. *Genome Biol.* 7(4): 212.
- Howe, G. A., 2001 Cyclopentenone signals for plant defense: Remodeling the jasmonic acid  
168 response. *Proc. Natl. Acad. Sci. U. S. A.* 98 (22): 12317-19.

- 170 Yang, D. L., J. Yao, C. S. Mei, X. H. Tong, L. J. Zeng *et al.*, 2012 Plant hormone jasmonate  
prioritizes defense over growth by interfering with gibberellin signaling cascade. *Proc.*  
172 *Natl. Acad. Sci. U. S. A.* 109: E1192-E1200.
- Gramzow, L., and G. Theissen, 2010 A hitchhiker's guide to the MADS world of plants. *Genome*  
174 *Biol.* 11(6): 214
- Gupta, R., and S. K. Chakrabarty, 2013 Gibberellic acid in plant. *Plant Signal. Behav.* 8 (9).
- Kawai, Y., E. Ono, and M. Mizutani, 2014 Evolution and diversity of the 2-oxoglutarate-  
176 dependent dioxygenase superfamily in plants. *Plant J.* 78: 328-43.
- Dornelas, M. C., and A. P. M. Rodriguez, 2005 A FLORICAULA/LEAFY gene homolog is  
178 preferentially expressed in developing female cones of the tropical pine *Pinus caribaea*  
var. *caribaea*. *Genet. Mol. Biol.* 28: 299-307.
- 180 Vicente, M. R. S., and J. Plasencia, 2011 Salicylic acid beyond defence: its role in plant growth  
and development. *J. Exp. Bot.* 62: 3321-3338.
